# Supplementary material
Source: Springer Nature journal article supplement (https://www.springermedizin.de/resource/supplementary/12967_2013_1846_MOESM3_ESM.pdf/9574944)

**HES****Fragment analysis****EGFR copy number****1****2****3****P1A**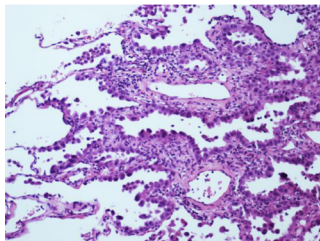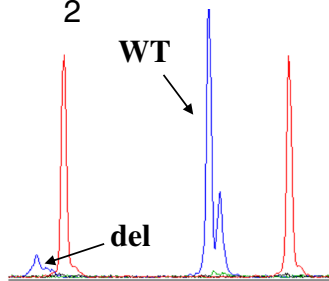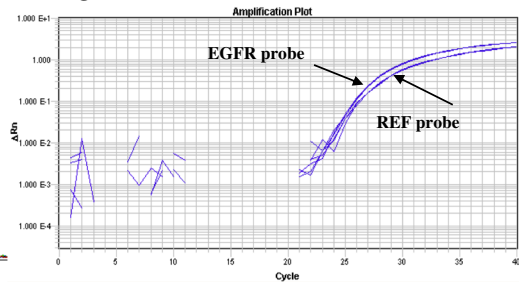

Ct EGFR: 26,74 ; Ct Ref: 27,46 ; CNV: 1,89

**P1B**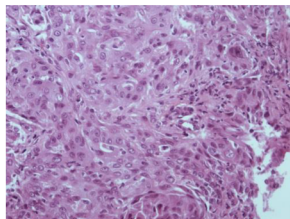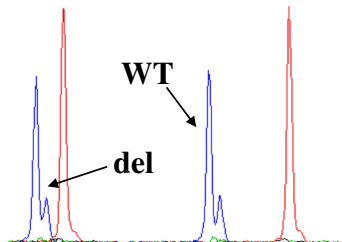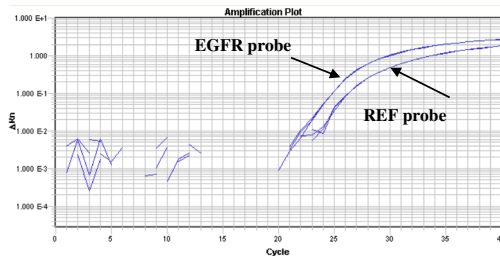

Ct EGFR: 25,68 ; Ct Ref: 27,31 ; CNV: 3,44

Supplement: MOESM3 [file 9574944]
